# Supplementary material
Source: PubMed Central journal article supplement (PMC4098728)
Supplement: NIHMS600714-supplement-06.pdf [file NIHMS600714-supplement-06.pdf]

**Table S1:** Body weight and triglyceride status of 12 month-old mice.

|        | Genotype                                   | BW (g)   | Triglyceride (mg/dl) | n  |
|--------|--------------------------------------------|----------|----------------------|----|
| Male   | WT                                         | 38.7±1.2 | 135.8±7.7            | 15 |
|        | cyp7b1 <sup>-/-</sup>                      | 36.0±1.7 | 166.0±12.4           | 12 |
|        | apoe <sup>-/-</sup>                        | 41.3±2.5 | 269.7±13.6*          | 15 |
|        | apoe <sup>-/-</sup> ;cyp7b1 <sup>-/-</sup> | 41.8±1.9 | 265.1±13.5*          | 15 |
|        |                                            |          |                      |    |
| Female | WT                                         | 32.2±3.3 | 129.0±28.4           | 6  |
|        | cyp7b1 <sup>-/-</sup>                      | 30.0±2.2 | 162.4±20.6           | 8  |
|        | apoe <sup>-/-</sup>                        | 30.4±2.9 | 380.0±31.2*†         | 10 |
|        | apoe <sup>-/-</sup> ;cyp7b1 <sup>-/-</sup> | 31.8±1.2 | 385.4±32.6*†         | 10 |

Mean±SEM, \*p<0.05 vs WT, †p<0.05 vs male

**Table S2:** Body weight and triglyceride status of 6 month-old mice.

|        | Genotype                                   | BW (g)                | Triglyceride (mg/dl) | n  |
|--------|--------------------------------------------|-----------------------|----------------------|----|
| Male   | WT                                         | 30.3±1.0              | 151.8±27.7           | 8  |
|        | cyp7b1 <sup>-/-</sup>                      | 29.8±1.4              | 177.5±13.2           | 12 |
|        | apoe <sup>-/-</sup>                        | 33.4±2.2              | 275.2±53.0           | 10 |
|        | apoe <sup>-/-</sup> ;cyp7b1 <sup>-/-</sup> | 33.9±0.9              | 281.7±29.7           | 10 |
|        |                                            |                       |                      |    |
| Female | WT                                         | 26.5±1.7 <sup>†</sup> | 197.2±19.7           | 6  |
|        | cyp7b1 <sup>-/-</sup>                      | 26.5±0.7 <sup>†</sup> | 166.5±22.8           | 12 |
|        | apoe <sup>-/-</sup>                        | 26.3±1.6 <sup>†</sup> | 289.7±27.8           | 9  |
|        | apoe <sup>-/-</sup> ;cyp7b1 <sup>-/-</sup> | 25.3±1.8 <sup>†</sup> | 224.6±12.5           | 6  |

Mean±SEM, †p&lt;0.05 vs male

**Table S3:** Cholesterol and 27HC status of E<sub>2</sub>-treated *apoe*<sup>-/-</sup> and *apoe*<sup>-/-</sup>;*cyp7b1*<sup>-/-</sup> mice.

|                                                            | Treatment | Cholesterol (mg/dl)  | Triglyceride (mg/dl) | 27HC (ng/ml)          | E2 (pg/ml) | BW (g)    |
|------------------------------------------------------------|-----------|----------------------|----------------------|-----------------------|------------|-----------|
| <i>apoe</i> <sup>-/-</sup>                                 | Vehicle   | 2185±73              | 202±15               | 1736±141              | 7±2        | 27.4±1.5  |
|                                                            | E2, 6 ug  | 1968±102             | 122±15*              | 1401±56*              | 60±18*     | 23.9±0.6* |
|                                                            | E2, 50 ug | 1112±287*            | 113±7*               | 1052±156*             | 1269±171*  | 23.3±0.8* |
| <i>apoe</i> <sup>-/-</sup><br><i>cyp7b1</i> <sup>-/-</sup> | Vehicle   | 1257±72 <sup>†</sup> | 198±10               | 1902±139 <sup>†</sup> | 6±1        | 28.4±1.2  |
|                                                            | E2, 6 ug  | 1219±73 <sup>†</sup> | 126±19*              | 1950±165 <sup>†</sup> | 54±17*     | 25.8±0.6  |
|                                                            | E2, 50 ug | 1017±227             | 134±21*              | 1741±141 <sup>†</sup> | 1219±79*   | 23.1±0.6* |

Mean±SEM, \*p<0.05 vs Veh, †p<0.05 vs *apoe*<sup>-/-</sup>, n=5-8, except *apoe*<sup>-/-</sup>;*cyp7b1*<sup>-/-</sup> n=12
